# Supplementary material
Source: PubMed Central journal article supplement (PMC3175787)
Supplement: supp_blood-2011-02-331579_Document1.pdf [file supp_blood-2011-02-331579_Document1.pdf]

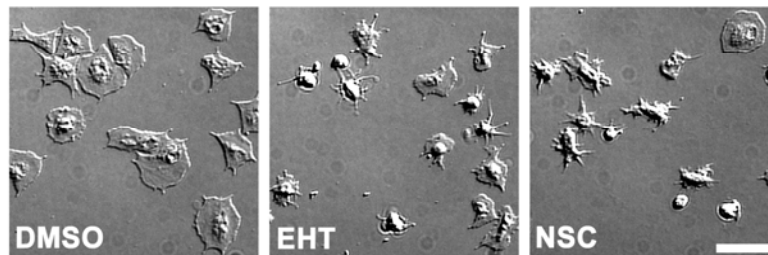

**Figure S1. The Rac inhibitors EHT 1864 and NSC23766 similarly inhibit platelet lamellipodia formation on fibrinogen.** Purified human platelets ( $2 \times 10^7$  / ml) were pretreated with 50  $\mu$ M EHT 1864 or 300  $\mu$ M NSC23766 for 10 minutes prior to spreading on fibrinogen coated coverglass (50  $\mu$ g/ml) in the presence of 2 U/ml apyrase. Representative DIC microscopy images are shown. Scale bar = 10  $\mu$ m.

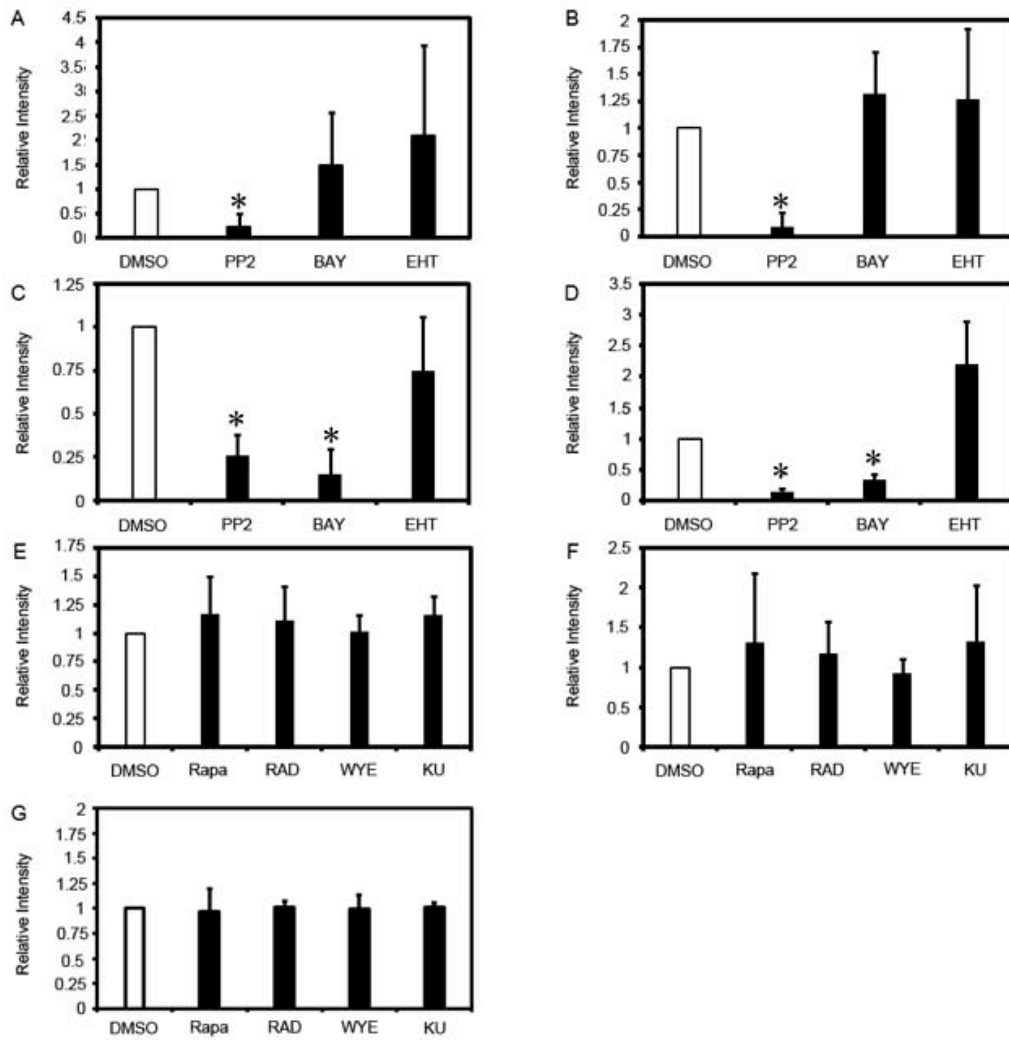

**Figure S2. Quantification and statistical analyses of western blot data from**

**Figure 1 and Figure 4.** Films from kinase activation western blot experiments in Figures 1 and 4 were digitally scanned and individual bands were quantified for pixel density using Image J software. Western blot densitometry statistical analysis was performed by calculating a paired t-test between the DMSO lane and each test condition for the protein specified (n=3). Shown above are band intensities relative to vehicle control for (A) pSyk in Figure 1B, (B) pLAT in Figure 1B, (C) pFAK in Figure 1B, (D) pS6K1 in Figure 1D, (E) pSyk in Figure 4B, (F) pFAK in Figure 4B and (G) pGSK3β. Asterisk (\*) indicates  $p < 0.05$  with respect to vehicle (DMSO).

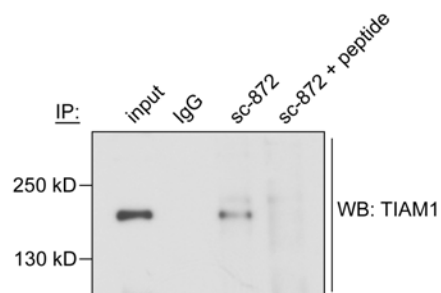

**Figure S3. Anti-TIAM1 sc-872 specifically immunoprecipitates TIAM1 from human platelet lysates.** M-PER-lysed human platelets were incubated at 4°C overnight with 10 µg non-specific rabbit IgGs (IgG), 10 µg anti-TIAM1 (sc-872), or 10 µg anti-TIAM1 in the presence of sc-872P TIAM1 antigen blocking peptide (sc-872 + peptide). Protein A/G Agarose beads were added to immunoprecipitation reactions for 1 hour and then washed 3 times with M-PER buffer. Captured proteins were eluted into Laemmli sample buffer plus DTT and western blotted (WB) for the presence of TIAM1. A 200 kD TIAM1-positive band was detected in whole platelet lysates (input) as well as sc-872 immunoprecipitates. Rabbit IgGs did not immunoprecipitate TIAM1. Inclusion of the TIAM1 antigen blocking peptide sc-872P with sc-872 antisera prevented the immunoprecipitation of TIAM1.

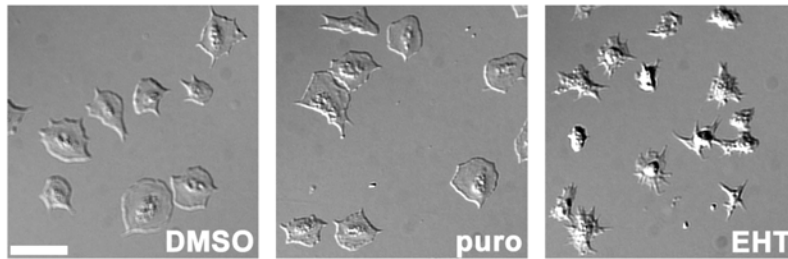

**Figure S4. Puromycin does not inhibit platelet lamellipodia formation on fibrinogen.** Purified human platelets ( $2 \times 10^7$  / ml) were pretreated with puromycin (puro, 100  $\mu\text{g/ml}$ , 10 min) or EHT 1864 (50  $\mu\text{M}$ ) prior to spreading on fibrinogen coated coverglass (50  $\mu\text{g/ml}$ ) in the presence of 2 U/ml apyrase. Representative DIC microscopy images are shown. Scale bar = 10  $\mu\text{m}$ .

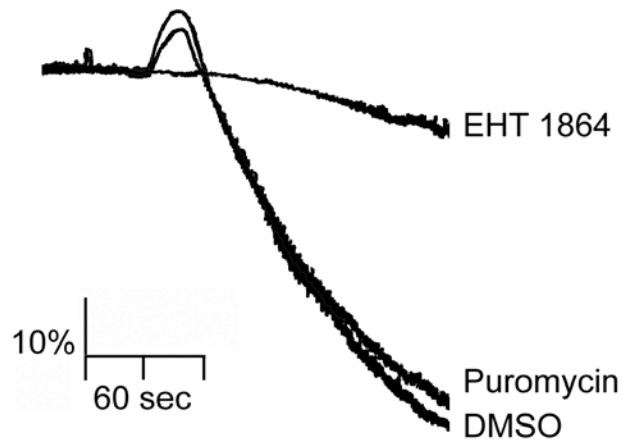

**Figure S5. Puromycin does not inhibit collagen-induced platelet aggregation**

Washed human platelets ( $2 \times 10^8$  / ml) were pretreated with puromycin (100  $\mu\text{g}/\text{ml}$ , 10 min) in the presence of 2 U/ml apyrase before stimulation with collagen (10  $\mu\text{g}/\text{ml}$ ) in solution and the change in optical density indicative of platelet aggregation was recorded. EHT 1864 (50  $\mu\text{M}$ ), an efficient inhibitor of platelet aggregation, serves as a positive control.
